# Supplementary material for: Asymmetric liquid crystalline dibenzo[a,h]anthracenes for organic semiconductors with high mobility and thermal stability
Source: Royal Society of Chemistry journal article supplement (doi:10.1039/d3cp00997a), 2023-01-01

## Asymmetric Liquid Crystalline Dibenzo[a,h]anthracenes for Organic Semiconductors with High Mobility and Thermal Stability

Yucong Bao,<sup>#a</sup> Liang Zhang,<sup>#a</sup> Haoming Wei,<sup>a</sup> Bingqiang Cao,<sup>\*b</sup> and Tengzhou Yang<sup>\*a</sup>

<sup>a</sup> School of Physics and Physical Engineering, Qufu Normal University, Qufu 273165, Shandong, China.

<sup>b</sup> School of Material Science and Engineering, University of Jinan, Jinan 250022, Shandong, China.

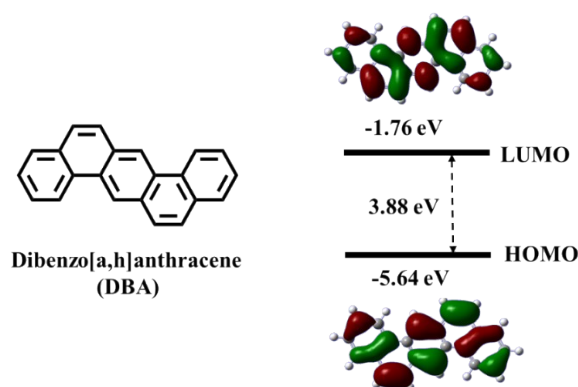

Fig. S1 Calculated frontier molecular orbitals of dibenzo[a,h]anthracene (DBA)

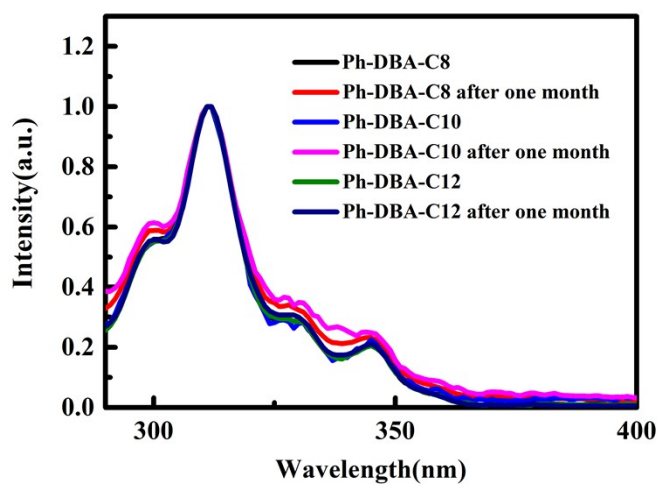

Fig. S2 Time-dependent UV-vis spectra of Ph-DBA-Cn in dilute  $\text{CHCl}_3$

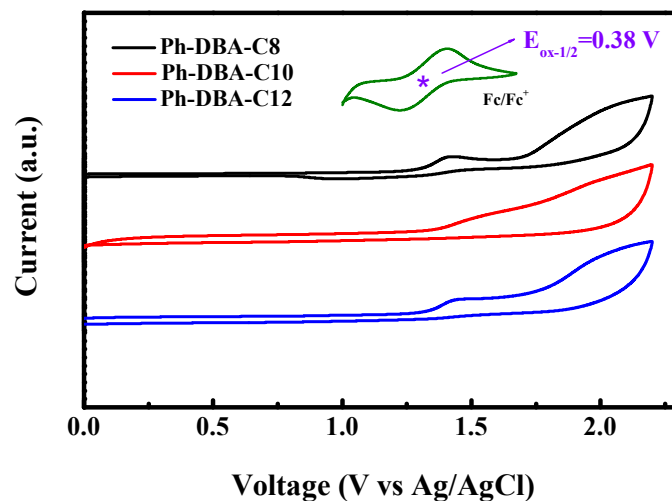

**Fig. S3** The CVs of Ph-DBA-Cn in  $\text{CH}_2\text{Cl}_2$  solution (Cyclic voltammograms measured in 0.1 M tetrabutylammonium hexafluorophosphate solutions with the ferrocene/ferrocenium ( $\text{Fc}/\text{Fc}^+$ ) redox couple as the external standard and Ag/AgCl as reference electrode at a scanning ramp of  $50 \text{ mV s}^{-1}$ )

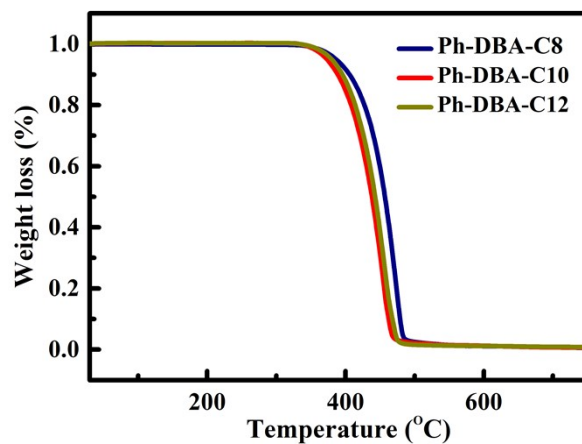

**Fig. S4** TGA thermograms of Ph-DBA-Cn at a heating rate of  $10 \text{ }^\circ\text{C}/\text{min}$  under  $\text{N}_2$  atmosphere

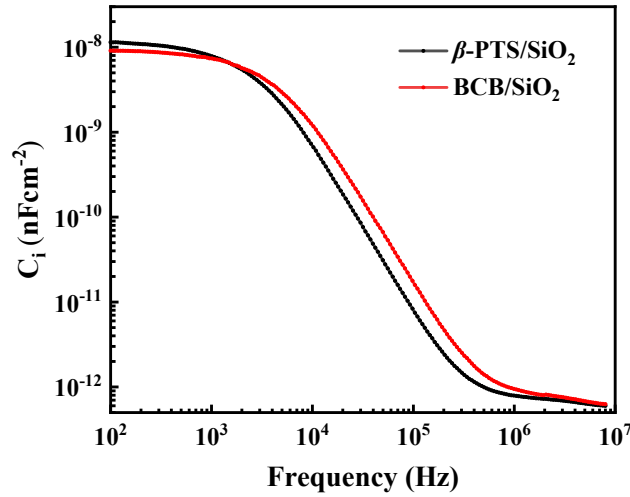

**Fig. S5** Frequency dependence of capacitance ( $C_i$ ) for  $\beta$ -PTS/SiO<sub>2</sub> and BCB/SiO<sub>2</sub> dielectrics measured from the sandwich structure (Au/insulator/heavily  $p$ -doped Si), showing  $C_i$  of 11.5 and 9.1 nF cm<sup>-2</sup> for  $\beta$ -PTS/SiO<sub>2</sub> and BCB/SiO<sub>2</sub> dielectrics, respectively, at 100 Hz.

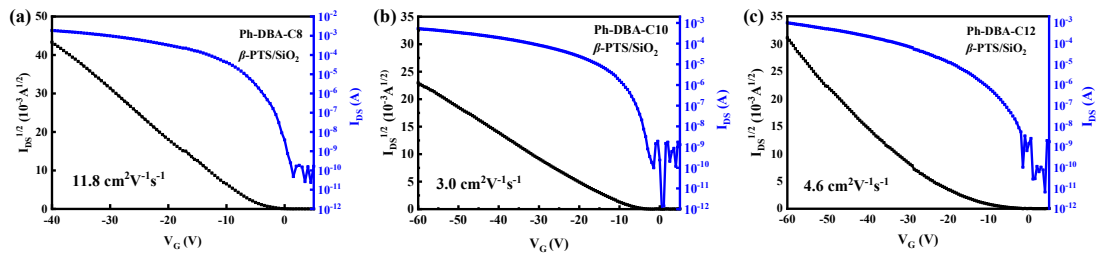

**Fig. S6** Transfer curves of Ph-DBA-Cn OTFTs on the  $\beta$ -PTS/SiO<sub>2</sub> dielectric

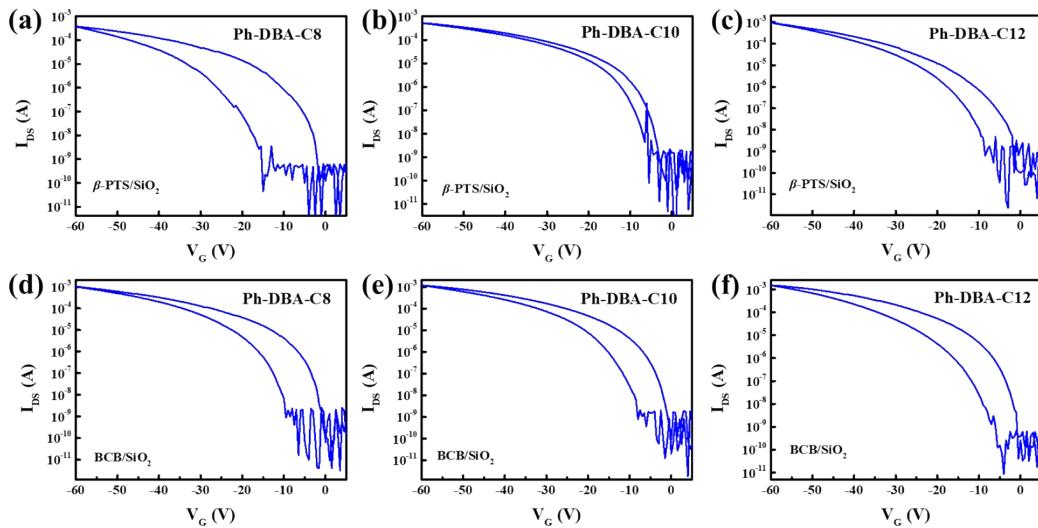

**Fig. S7** Transfer curves of Ph-DBA-Cn OTFTs during forward and the forward and reverse scanning

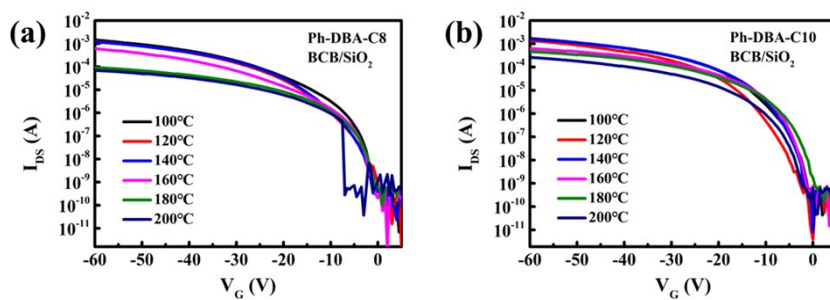

**Fig. S8** Temperature-related transfer characteristics OTFTs on the BCB/SiO<sub>2</sub> dielectric (a) Ph-DBA-C8, (b) Ph-DBA-C10

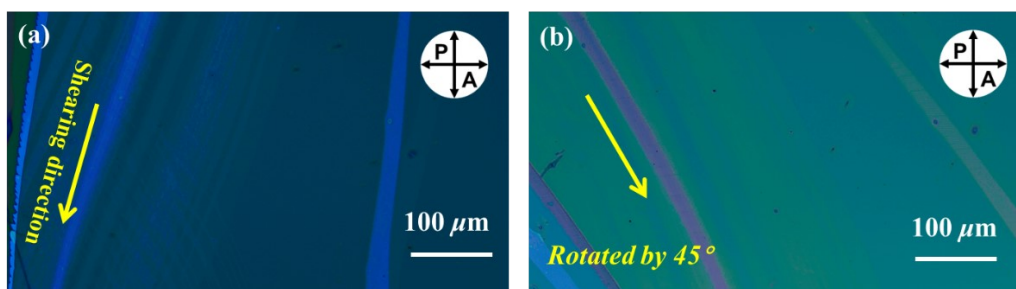

**Fig. S9** POM textures of the blade-coated Ph-DBA-C10 film on the BCB-covered substrate (a) 0°, and (b) 45°.

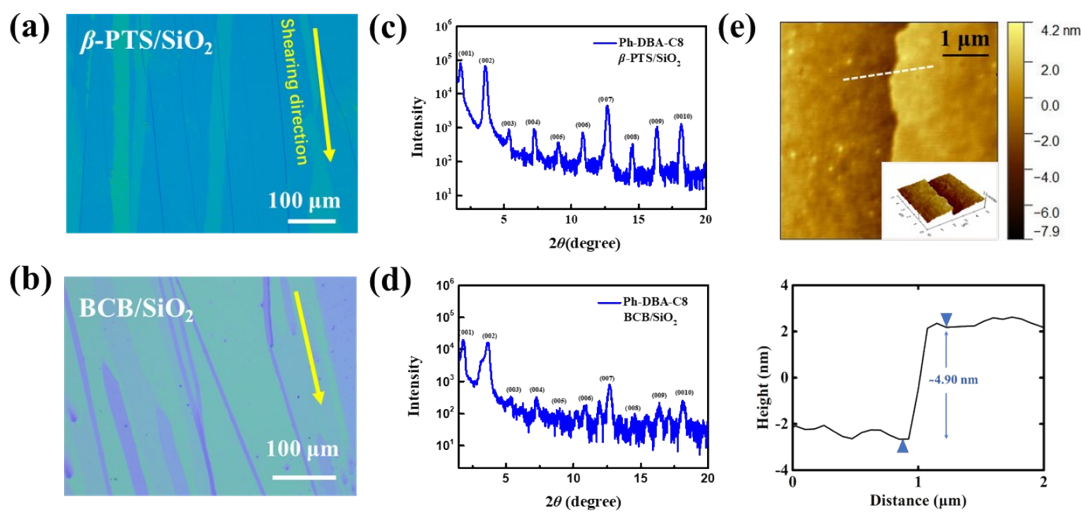

**Fig. S10** Optical microscopy images and XRD patterns of the blade-coated Ph-DBA-C8 films on the  $\beta$ -PTS/SiO<sub>2</sub> (a,c) and BCB/SiO<sub>2</sub> (b,d) dielectrics. (e) AFM topographic image and corresponding cross-sectional height profile of the blade-coated Ph-DBA-C8 film on the BCB/SiO<sub>2</sub> dielectric.

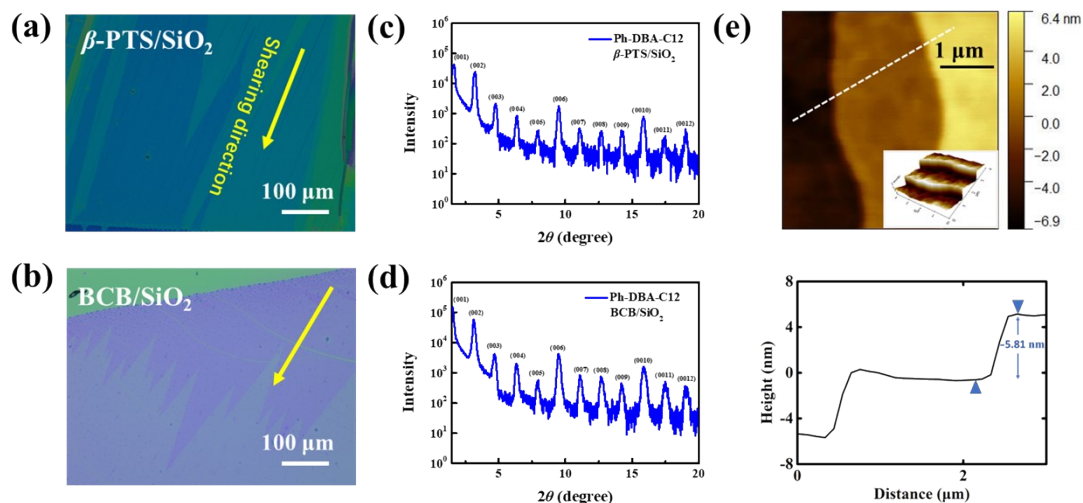

**Fig. S11** Optical microscopy images and XRD patterns of the blade-coated Ph-DBA-C12 films on the  $\beta$ -PTS/SiO<sub>2</sub> (a,c) and BCB/SiO<sub>2</sub> (b,d) dielectrics. (e) AFM topographic image and corresponding cross-sectional height profile of the blade-coated Ph-DBA-C12 film on the BCB/SiO<sub>2</sub> dielectric.

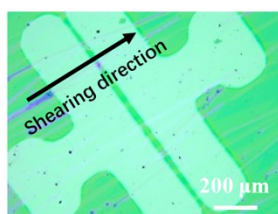

**Fig. S12** The optical microscopy image of source/drain electrodes on the blade-coated film

**Table S1** Summary of thermal behaviors of phase-transition temperatures ( $^{\circ}\text{C}$ ) with corresponding transitions enthalpies ( $\Delta\text{H}/\text{KJmol}^{-1}$ ) and phases of Ph-DBA-C<sub>n</sub> determined by the DSC curves and POM textures during the second heating process at a rate of  $10\text{ }^{\circ}\text{C}/\text{min}$ .

| Compound                                      | Phase Transition T/ $^{\circ}\text{C}$ ( $\Delta\text{H}/\text{KJmol}^{-1}$ )          |
|-----------------------------------------------|----------------------------------------------------------------------------------------|
| Ph-DBA-C8                                     | C <sub>r1</sub> 131 (-) C <sub>r2</sub> 207 (0.37) SmE 279 (1.70) SmA 339 (1.28) Iso   |
| Ph-DBA-C10                                    | C <sub>r1</sub> 129 (-) C <sub>r2</sub> 197 (0.46) SmE 276 (1.56) SmA 332 (1.20) Iso   |
| Ph-DBA-C12                                    | C <sub>r1</sub> 121 (0.47) C <sub>r2</sub> 191 (0.31) SmE 273(1.37) SmA 322 (1.03) Iso |
| Crystalline: Cr, Smectic: Sm, Isotropic: Iso. |                                                                                        |

**Table S2** Structural parameters of the blade-coated Ph-DBA-Cn films

| Compound          | Dielectrics                   | $d_{001}$ ( $\text{\AA}$ ) <sup>a</sup> | $L$ ( $\text{\AA}$ ) <sup>b</sup> | $\theta_{\text{tilt}}$ ( $^\circ$ ) <sup>c</sup> |
|-------------------|-------------------------------|-----------------------------------------|-----------------------------------|--------------------------------------------------|
| <b>Ph-DBA-C8</b>  | $\beta$ -PTS/SiO <sub>2</sub> | 50.1                                    | 27.2                              | ~23                                              |
|                   | BCB/SiO <sub>2</sub>          | 49.1                                    |                                   | ~26                                              |
| <b>Ph-DBA-C10</b> | $\beta$ -PTS/SiO <sub>2</sub> | 50.1                                    | 29.4                              | ~32                                              |
|                   | BCB/SiO <sub>2</sub>          | 51.0                                    |                                   | ~30                                              |
| <b>Ph-DBA-C12</b> | $\beta$ -PTS/SiO <sub>2</sub> | 52.8                                    | 32.3                              | ~35                                              |
|                   | BCB/SiO <sub>2</sub>          | —                                       |                                   | —                                                |

<sup>a</sup>Interlayer distance determined from the (001) reflection of the XRD patterns. <sup>b</sup>Molecular length estimated from the DFT-Optimized structures. <sup>c</sup>Molecular inclination angle with respect to the substrate normal, defined as  $\theta_{\text{tilt}} = \cos^{-1}(d_{001}/2L)$ .

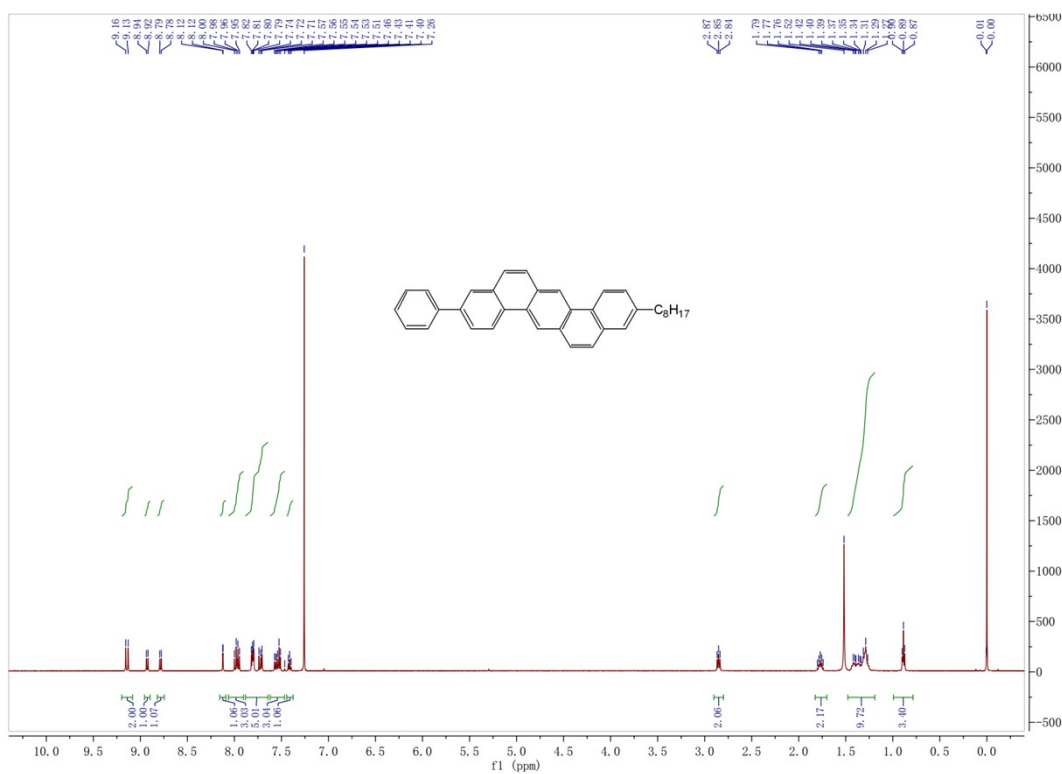

CH-1 #9-17\_RT: 0.08-0.16\_AV: 9\_NL:2.41E6  
T: FTMS + p APCI corona Full ms [50.0000-750.0000]

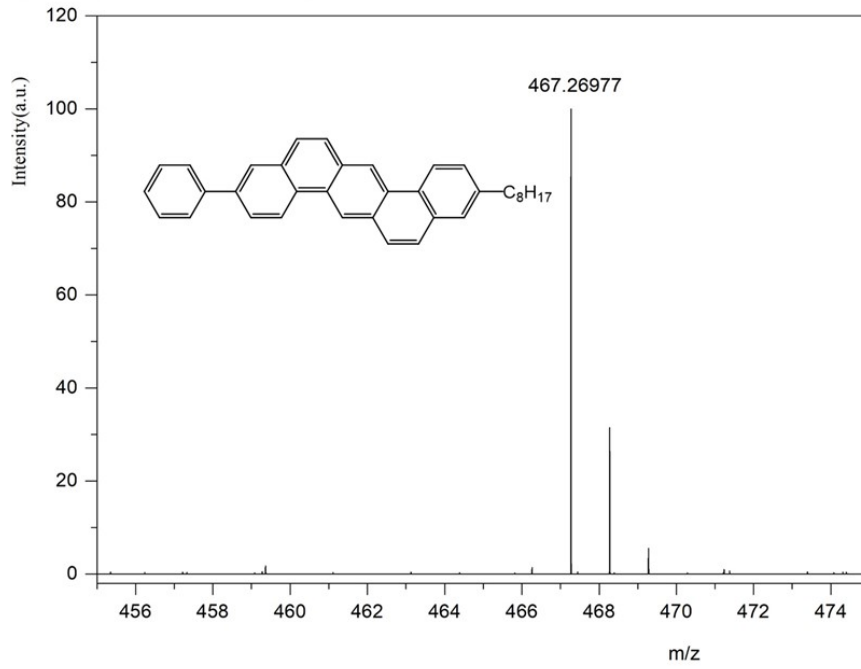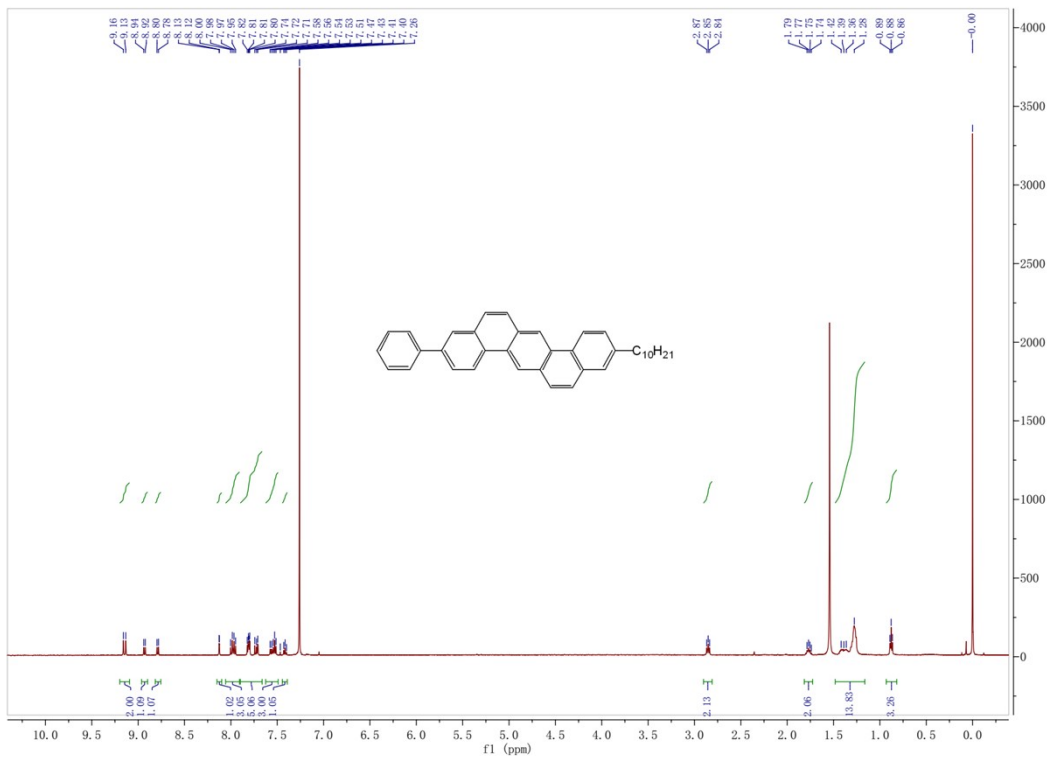

CH-1 #9-17\_RT: 0.08-0.16\_AV: 9\_NL:2.41E6

T: \_FTMS + p APCI corona Full ms [50.0000-750.0000]

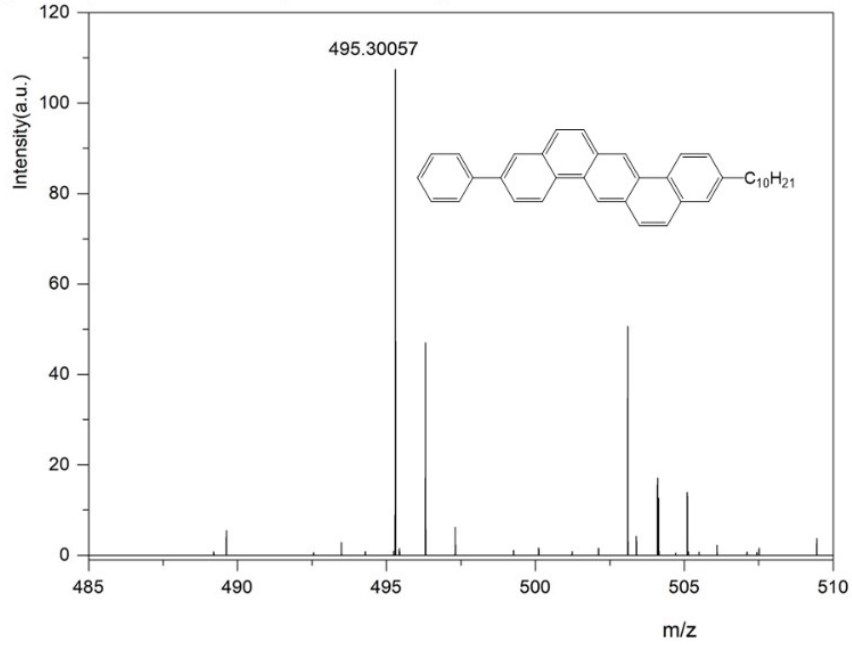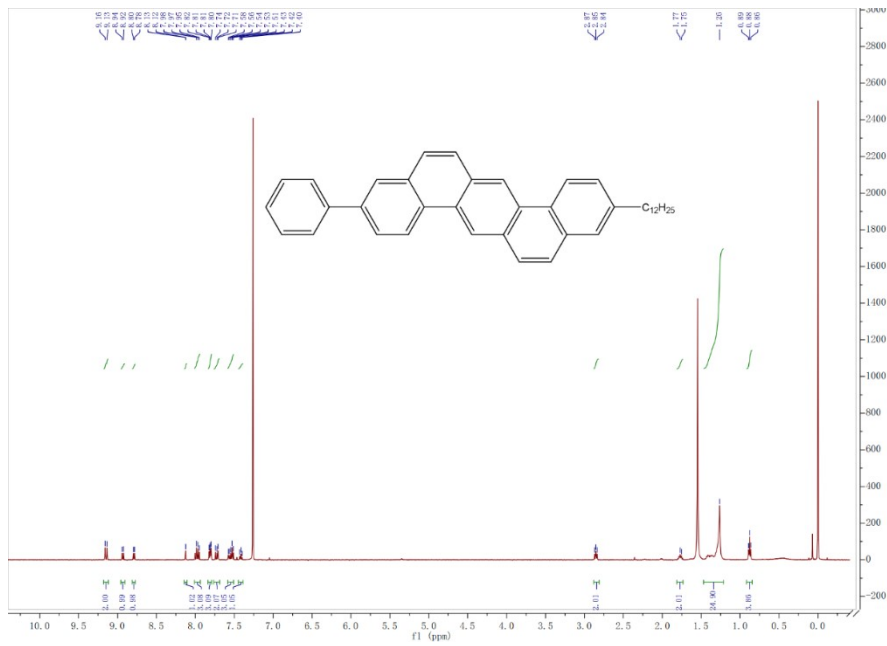



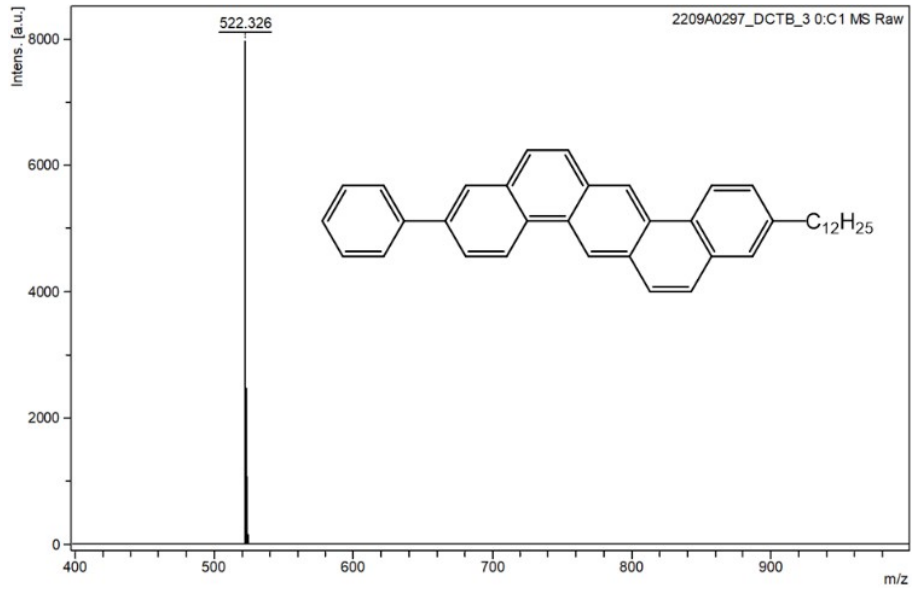

Supplement: d3cp00997a1.pdf [file d3cp00997a1.pdf]
